# Supplementary material for: Circular RNA vaccines with long-term lymph node-targeting delivery stability after lyophilization induce potent and persistent immune responses
Source: PubMed Central journal article supplement (PMC10790773; doi:10.1128/mbio.01775-23), 2023-12-11
Supplement: mbio.01775-23-s0001.pdf [file mbio.01775-23-s0001.pdf]

## **Supplemental Material**

### **Titer:**

### **Circular RNA vaccines with long-term lymph node-targeting delivery stability after lyophilization induce potent and persistent immune responses**

Jiawu Wan<sup>1,2,3#</sup>, Zongmei Wang<sup>1,2,3#</sup>, Lingli Wang<sup>1,2,3</sup>, Liqin Wu<sup>1,2,3</sup>, Ming Zhou<sup>1,2,3</sup>, Chengguang Zhang<sup>1,2,3</sup>, Huanchun Chen<sup>1,2,3</sup>, Zhen F. Fu<sup>1,2,3</sup>, Ling Zhao<sup>1,2,3\*</sup>

<sup>1</sup>National Key Laboratory of Agricultural Microbiology, Huazhong Agricultural University, Wuhan, China

<sup>2</sup> Hubei Hongshan Laboratory, Wuhan, China

<sup>3</sup> Key Laboratory of Preventive Veterinary Medicine of Hubei Province, College of Veterinary Medicine, Huazhong Agricultural University, Wuhan, China

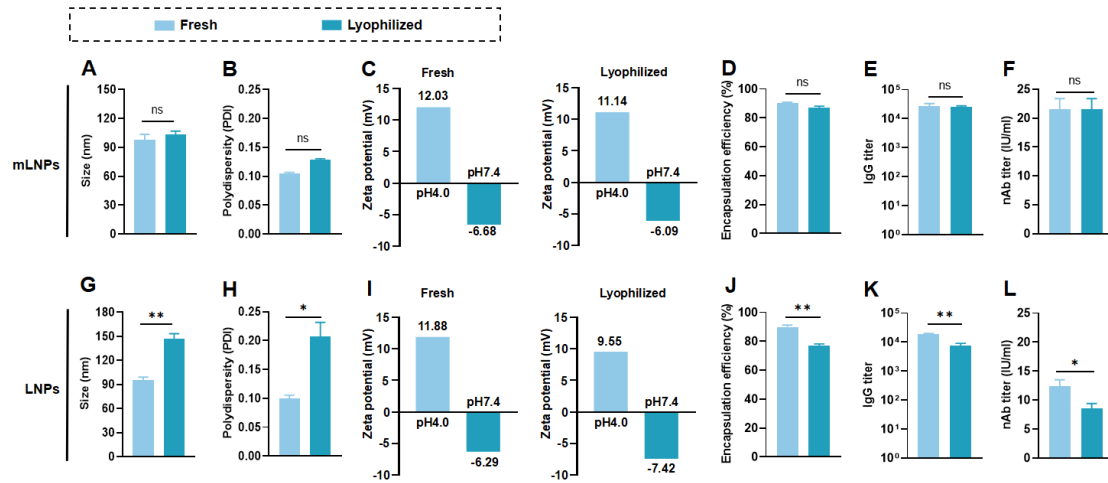

**Figure S1. Mannose modification improved the stability of LNPs after lyophilization.** Lyophilized LNP-circRNA-G and mLNP-circRNA-G were rehydrated for analysis of their physical properties. Mice were immunized once, and serum samples were collected on day 14 for antibody detection. (A-L) Particle size (A, G), PDI (B, H), zeta potential (C, I), mRNA encapsulation efficiency (D, J), IgG titer (E, K) and nAb titer (F, L).

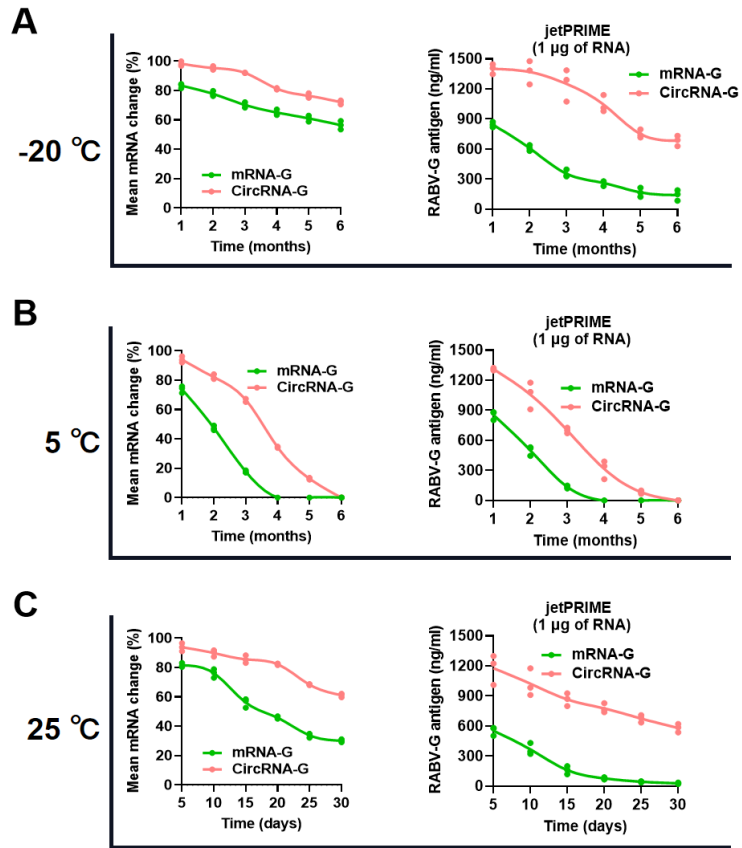

**Figure S2. CircRNA-G vaccines are more stable than mRNA-G vaccines.** (A-C) The degradation rate and antigen expression of circRNA-G and mRNA-G were stored at different temperatures.

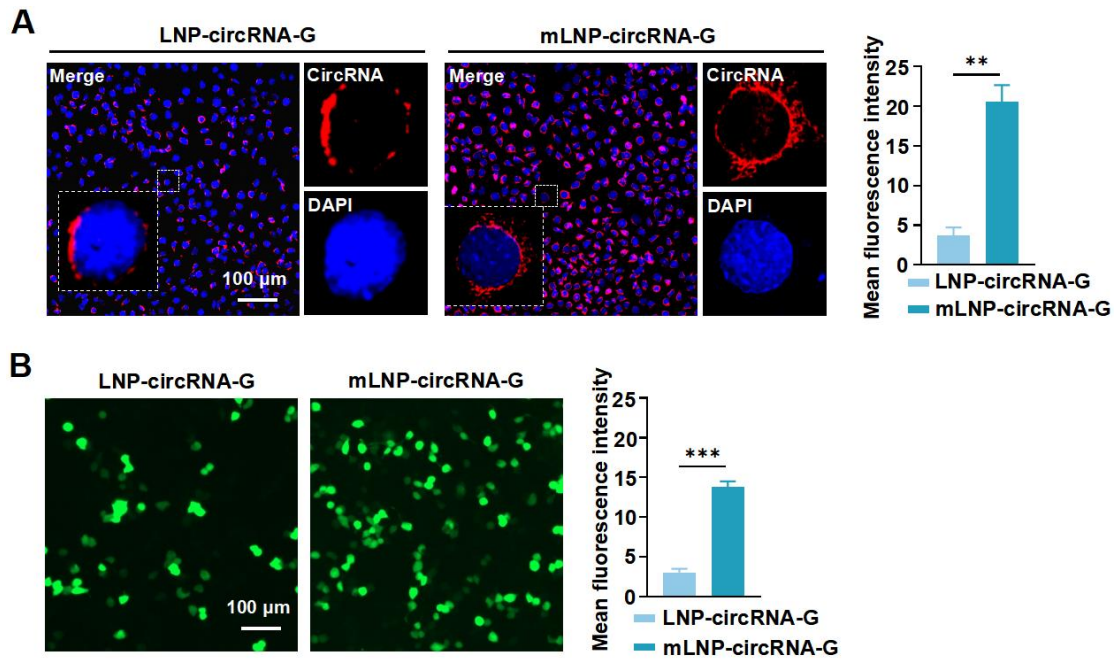

**Figure S3. Cellular internalization of mLNP-circRNA-G nanoparticles.** (A) Cellular uptake of mLNP-circRNA-G or LNP-circRNA-G in DC2.4 cells. Scale bar, 100  $\mu$ m. (B) mLNP-circRNA-G or LNP-circRNA-G was transfected into DC2.4 cells. Cells were harvested after incubation for 24 h and detected using G protein monoclonal antibodies. G protein expression was visualized using inverted fluorescence microscopy.

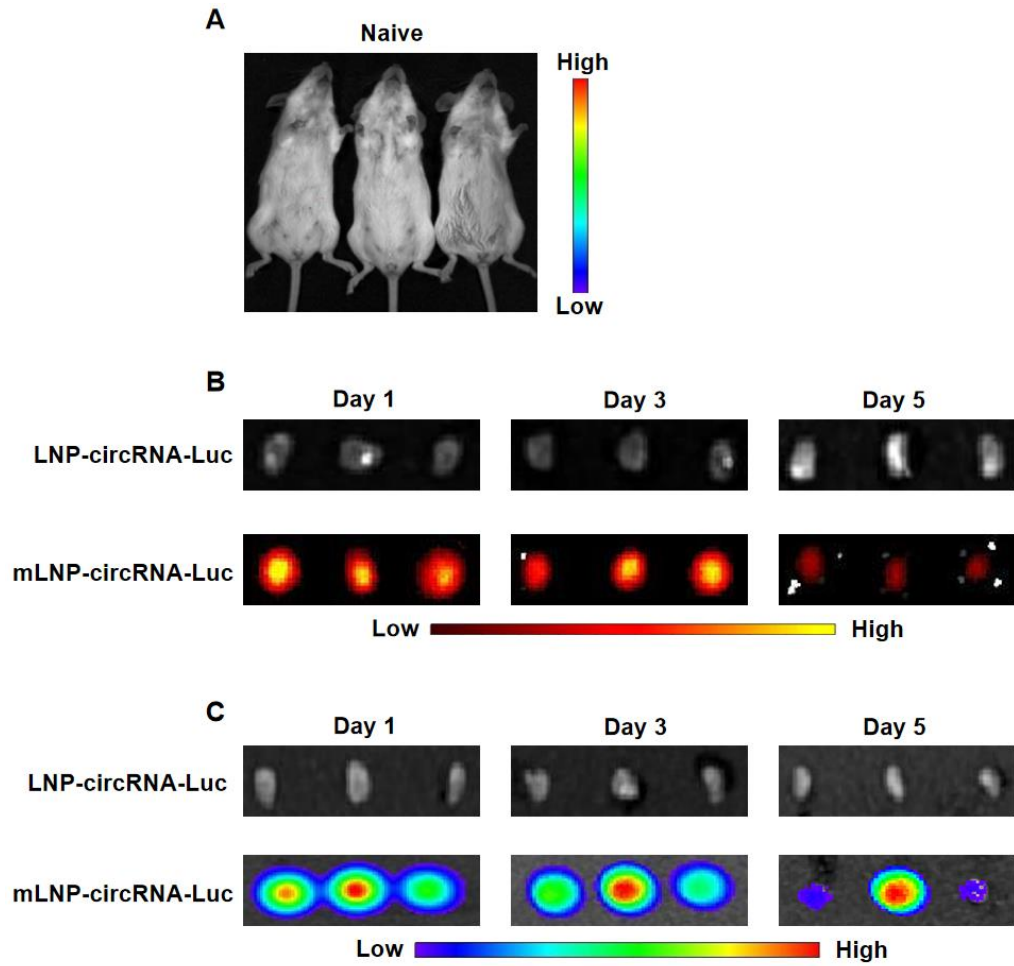

**Figure S4. LN targeting.** (A) Bioluminescence imaging of untreated mice, related to Figure 3B. Fluorescence (B) and bioluminescence (C) imaging of excised dLNs at 1, 3 and 5 dpi.

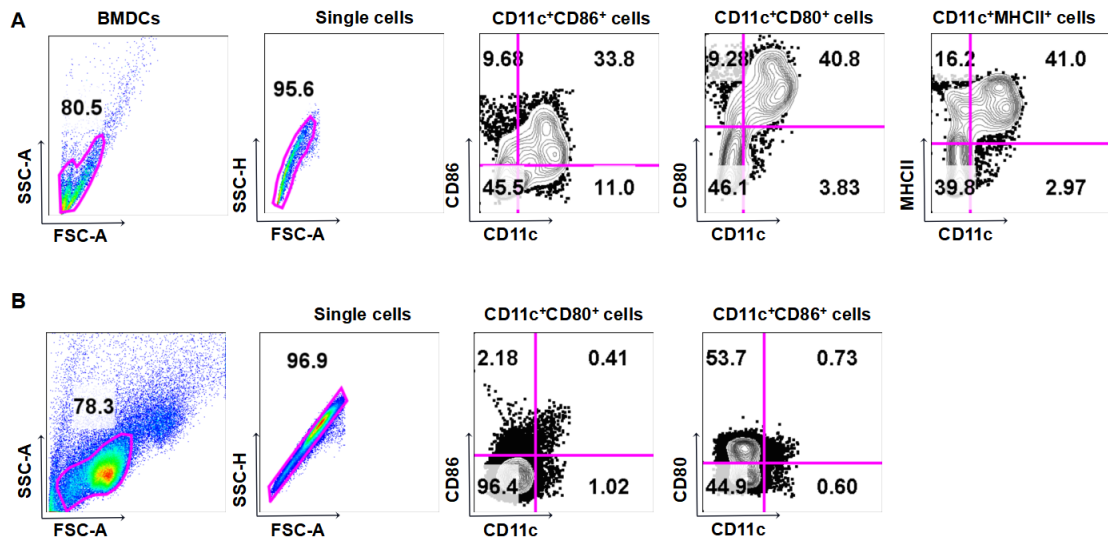

**Figure S5. Gating strategy of intracellular staining for flow cytometry.** (A) The gating strategy of mature BMDCs (CD11c<sup>+</sup>CD86<sup>+</sup>, CD11c<sup>+</sup>CD80<sup>+</sup>, or CD11c<sup>+</sup>MHCII<sup>+</sup> cells). (B) The gating strategies of mature cDCs (CD11c<sup>+</sup>CD80<sup>+</sup> and CD11c<sup>+</sup>CD86<sup>+</sup> cells) in LNs.

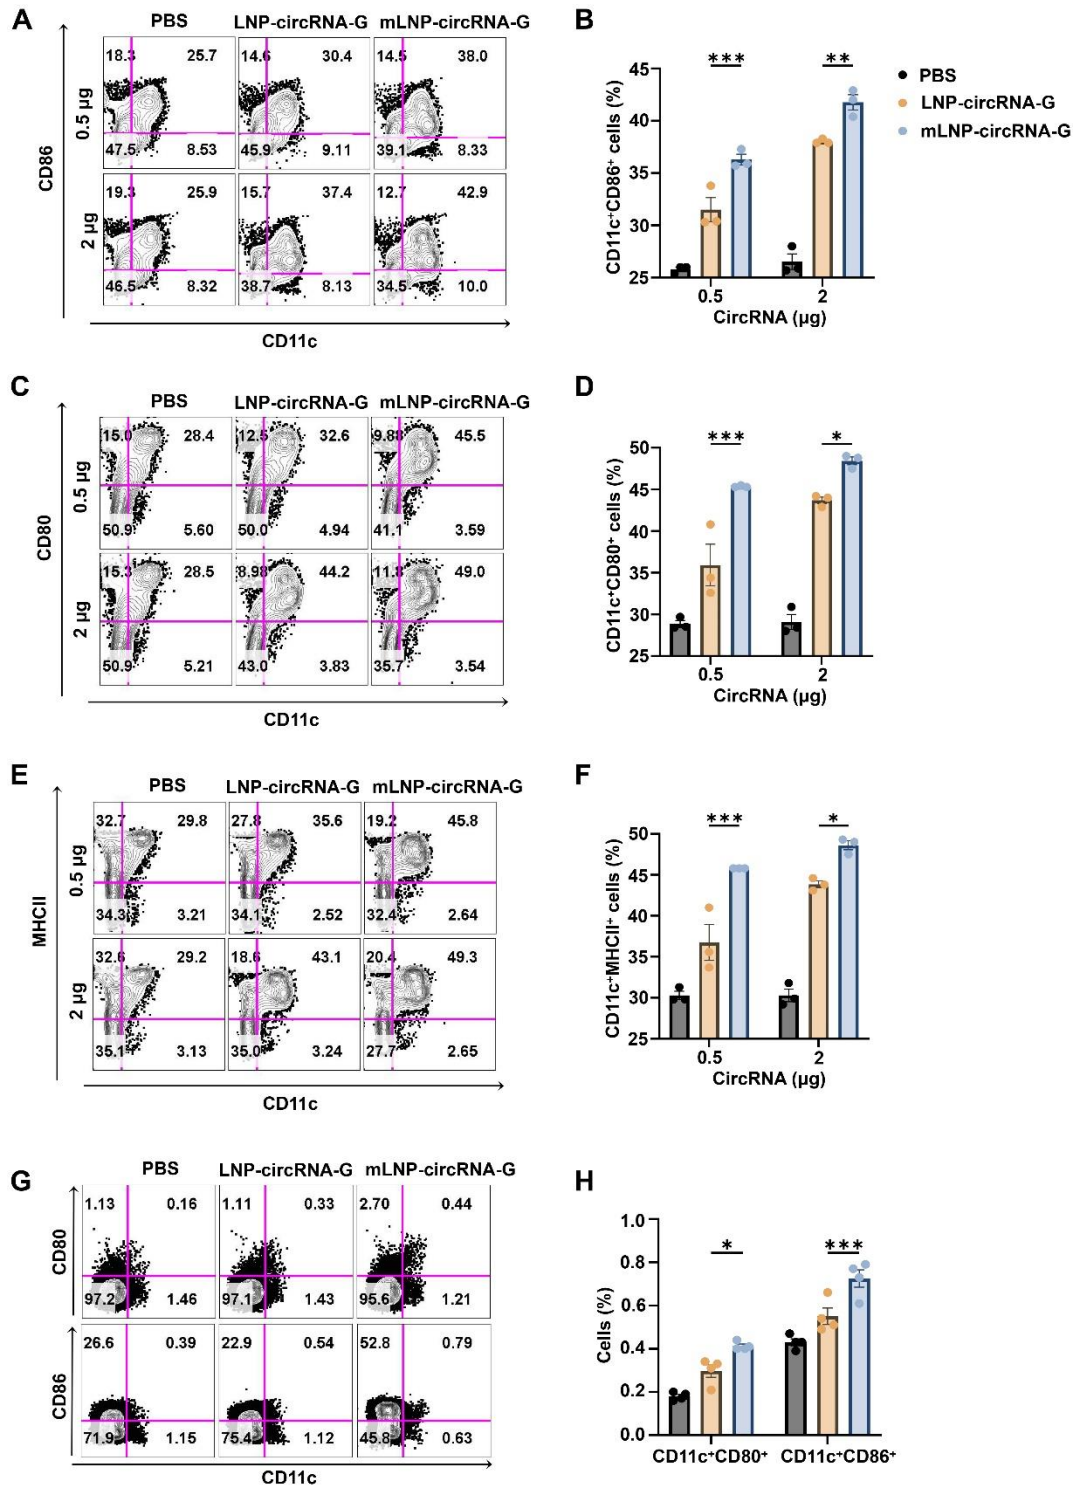

**Figure S6. Effect of mLNP-circRNA-G on the maturation of DCs in vitro and in vivo.** (A) Representative flow cytometric plots of CD11c<sup>+</sup>CD86<sup>+</sup> cells. BMDCs were treated with 0.5  $\mu$ g or 2  $\mu$ g of mLNP-circRNA-G or LNP-circRNA-G or DMEM. At 24 h, the cells were harvested and subjected to flow cytometric analysis. (B) Statistical results of CD11c<sup>+</sup>CD86<sup>+</sup> cells. (C) Representative flow cytometric plots of CD11c<sup>+</sup>CD80<sup>+</sup> cells. (D) Statistical results of CD11c<sup>+</sup>CD80<sup>+</sup> cells. (E) Representative flow cytometric plots of CD11c<sup>+</sup>MHCII<sup>+</sup> cells. (F) Statistical results of CD11c<sup>+</sup>MHCII<sup>+</sup> cells. (G) Representative flow cytometric plots of CD11c<sup>+</sup>CD80<sup>+</sup> DCs and CD11c<sup>+</sup>CD86<sup>+</sup> DCs in LNs. (H) Statistical results of mature cDCs in LNs.

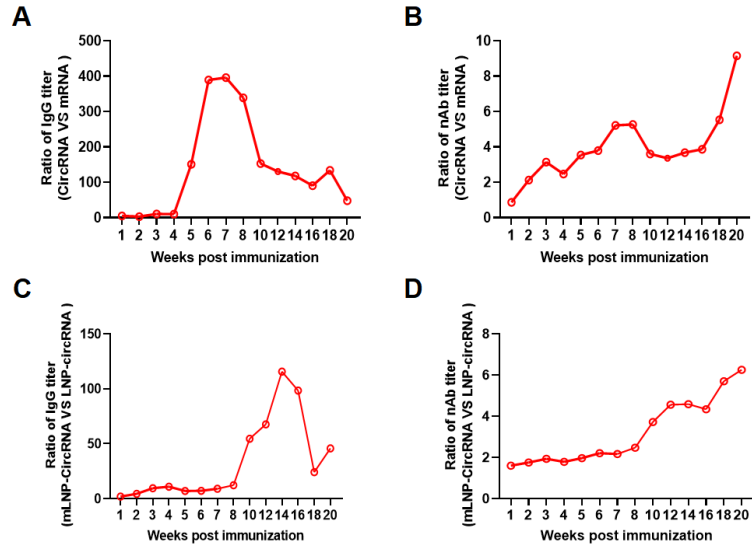

**Figure S7. CircRNA-G and LN-targeting delivery immunization induces higher Ab titers.** (A-B) The ratio of IgG and nAb titers induced by the LNP-circRNA-G vaccine to that induced by the LNP-mRNA-G vaccine. (C-D) The ratio of IgG and nAb titers induced by the mLNP-circRNA-G vaccine to that induced by the LNP-circRNA-G vaccine.



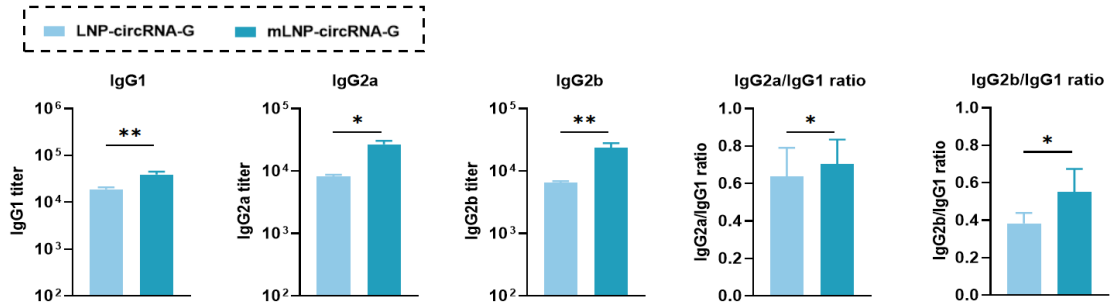

**Figure S8. A balanced Th1/Th2 immune response was induced by mLNP-circRNA-G.** ICR mice were immunized with a single injection of 2  $\mu$ g of mLNP-circRNA-G or LNP-circRNA-G. Sera were collected week 4 post immunization and assessed by ELISA for RABV G-specific IgG1, IgG2a and IgG2b titers. Titer ratios of IgG2a to IgG1 and IgG2b to IgG1 were calculated. Data are means  $\pm$  SEMs (n = 10).

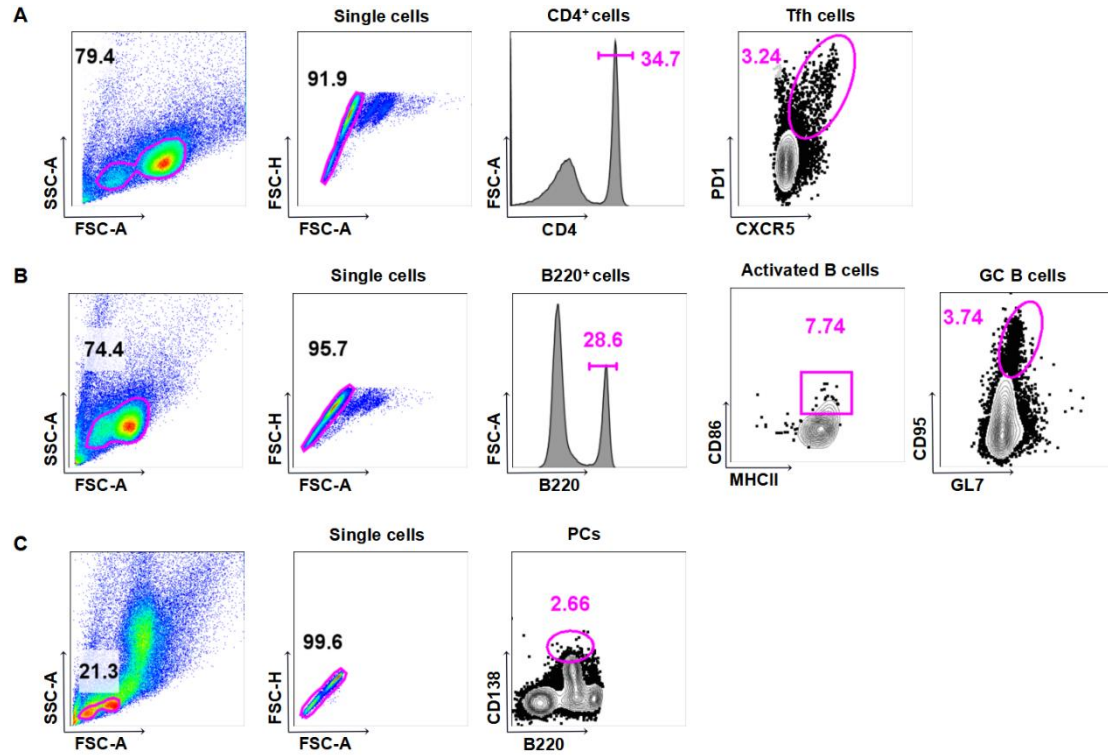

**Figure S9. Gating strategy of staining for flow cytometry.** (A) The gating strategy of Tfh ( $CD4^+CXCR5^+PD1^+$ ) cells in LNs. (B) The gating strategies of activated B cells ( $B220^+MHCII^+CD86^+$  cells) and GC B cells ( $B220^+GL7^+CD95^+$  cells) in LNs. (C) The gating strategy of LLPCs ( $B220^{low}CD138^+$  cells) in BMs.

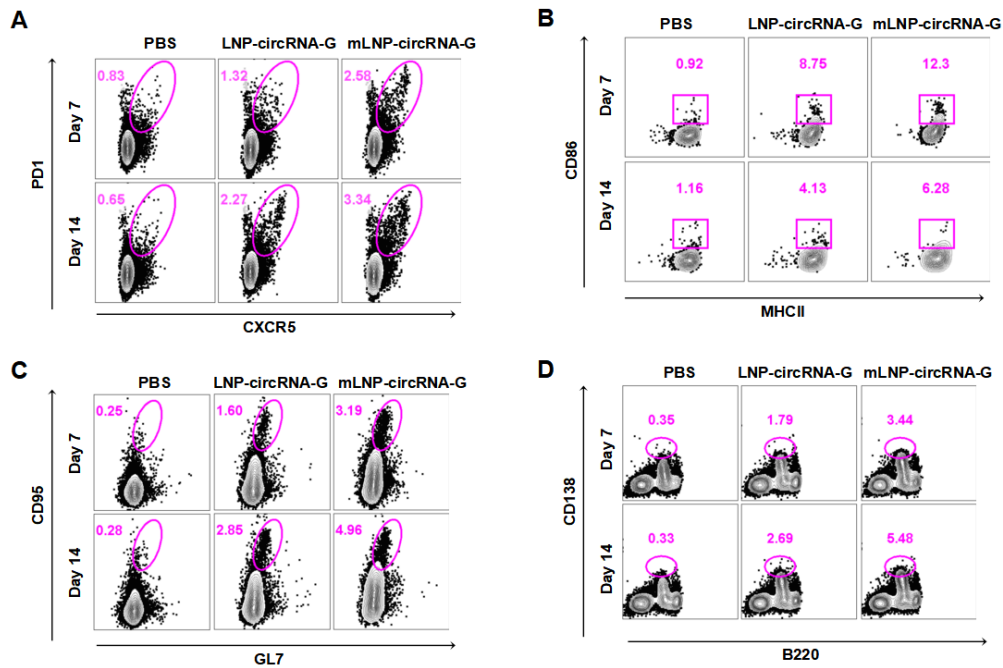

**Figure S10. mLNP-circRNA-G facilitates the generation of Tfh cells, activated B cells, GC B cells, LLPCs and RABV-specific ASCs.** (A) Representative flow cytometric plots of Tfh ( $CD4^+CXCR5^+PD1^+$ ) cells. C57BL/6 mice were immunized with 2  $\mu$ g of mLNP-circRNA-G, LNP-circRNA-G, or DMEM ( $n = 4$ ). Draining LNs or BMs were collected at 7 dpi and 14 dpi, and cell suspensions were analyzed by flow cytometry. (B) Representative flow cytometric plots of activated B cells ( $B220^+MHCII^+CD86^+$ ). (C) Representative flow cytometric plots of GC B cells ( $B220^+GL7^+CD95^+$ ). (D) Representative flow cytometric plots of LLPCs ( $B220^{low}CD138^+$ ).

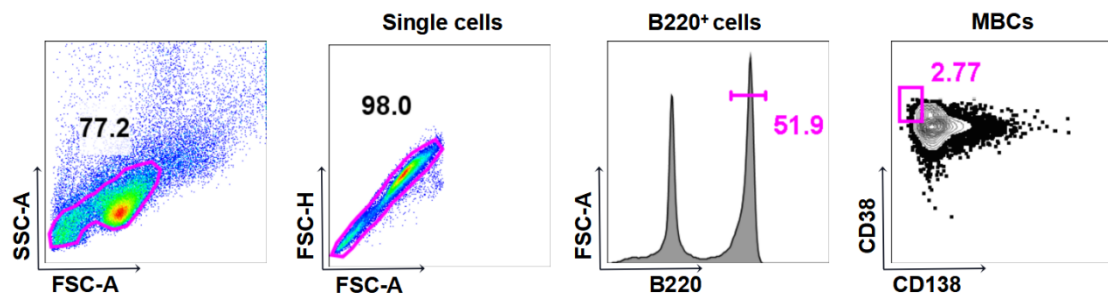

**Figure S11. Gating strategy of staining for flow cytometry.** The gating strategies of MBCs (B220<sup>+</sup>CD38<sup>+</sup>CD138<sup>-</sup> cells) in LNs.

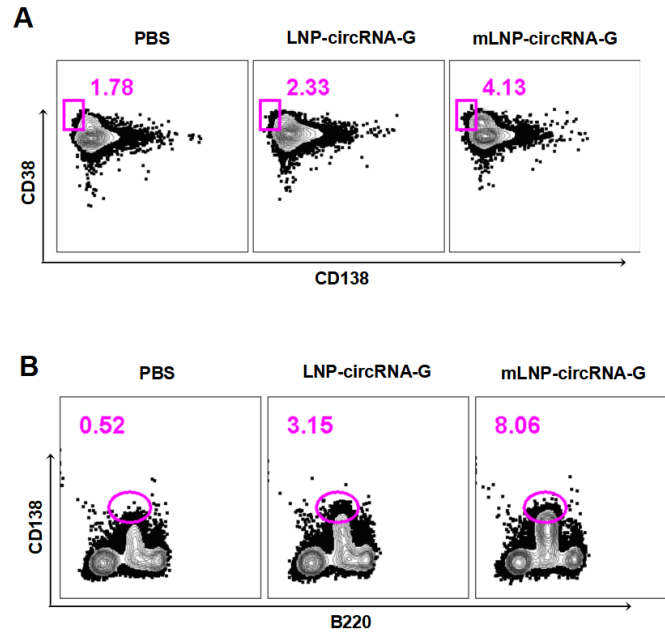

**Figure S12. mLNP-circRNA-G induces MBC generation and secondary antibody responses.** (A) Representative flow cytometric plots of MBCs ( $B220^+CD38^+CD138^-$ ) in LNs. C57BL/6 mice ( $n = 4$ ) were immunized with 2  $\mu\text{g}$  of mLNP-circRNA-G, LNP-circRNA-G, or DMEM. At 100 dpi, single LN cells were stained with antibodies to analyze the MBCs by flow cytometry. (B) Representative flow cytometric plots of LLPCs ( $B220^{\text{low}} CD138^+$ ). Mice were boosted with 2  $\mu\text{g}$  of mLNP-circRNA-G or LNP-circRNA-G at 100 days after primary immunization. At 14 days after the boost, LLPCs in BMs were evaluated by flow cytometry.

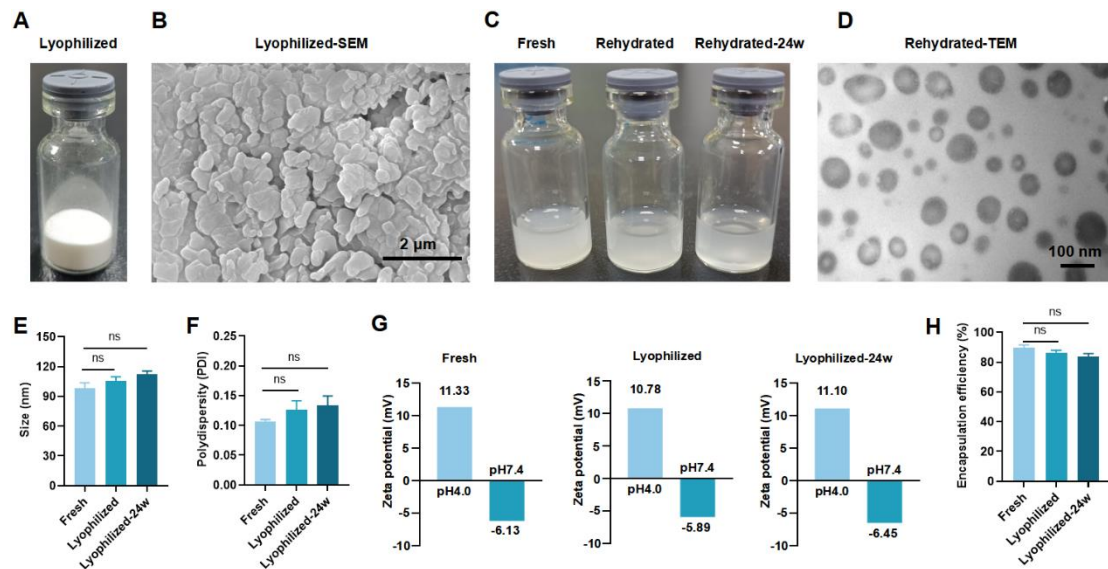

**Figure S13. Lyophilized mLNP-circRNA-G exhibits long-term stability.** (A) Image of lyophilized mLNP-circRNA-G. (B) SEM image of lyophilized mLNP-circRNA-G. (C) Image of fresh mLNP-circRNA-G, lyophilized mLNP-circRNA-G and the rehydrated solutions. (D) TEM image of rehydrated mLNP-circRNA-G. (E-H) Long-term stability of lyophilized mLNP-circRNA-G. Changes in the size (E), PDI (F), zeta potential (G) and encapsulation efficiency (H) of lyocircRNA-G mLNPs after storage at 4 °C for 24 weeks.

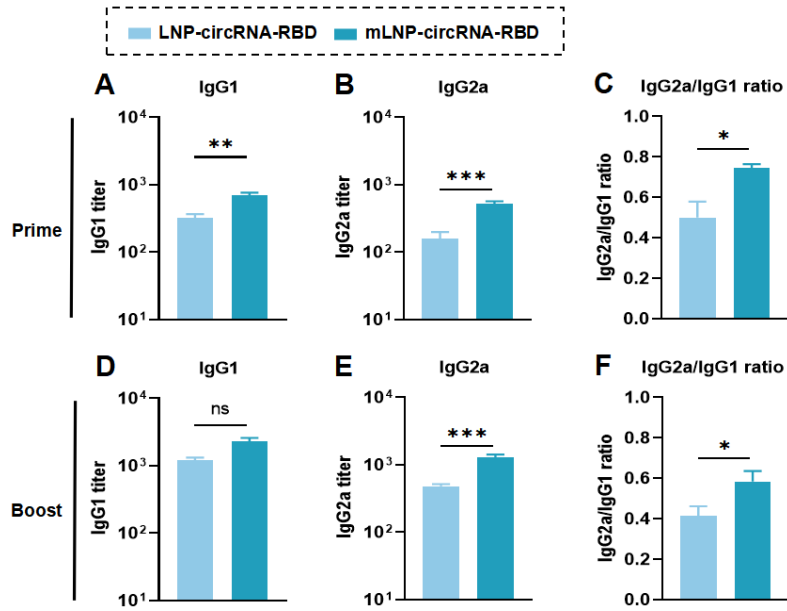

**Figure S14. A balanced Th1/Th2 immune response is induced by mLNP-circRNA-RBD.** ICR mice were immunized with a single injection of 5  $\mu$ g of mLNP-circRNA-RBD or LNP-circRNA-RBD. Sera were collected at week 4 after primary and booster immunization and assessed by ELISA for RABV G-specific IgG1 and IgG2a titers. Titer ratios of IgG2a to IgG1 were calculated. Data are means  $\pm$  SEMs (n = 5).

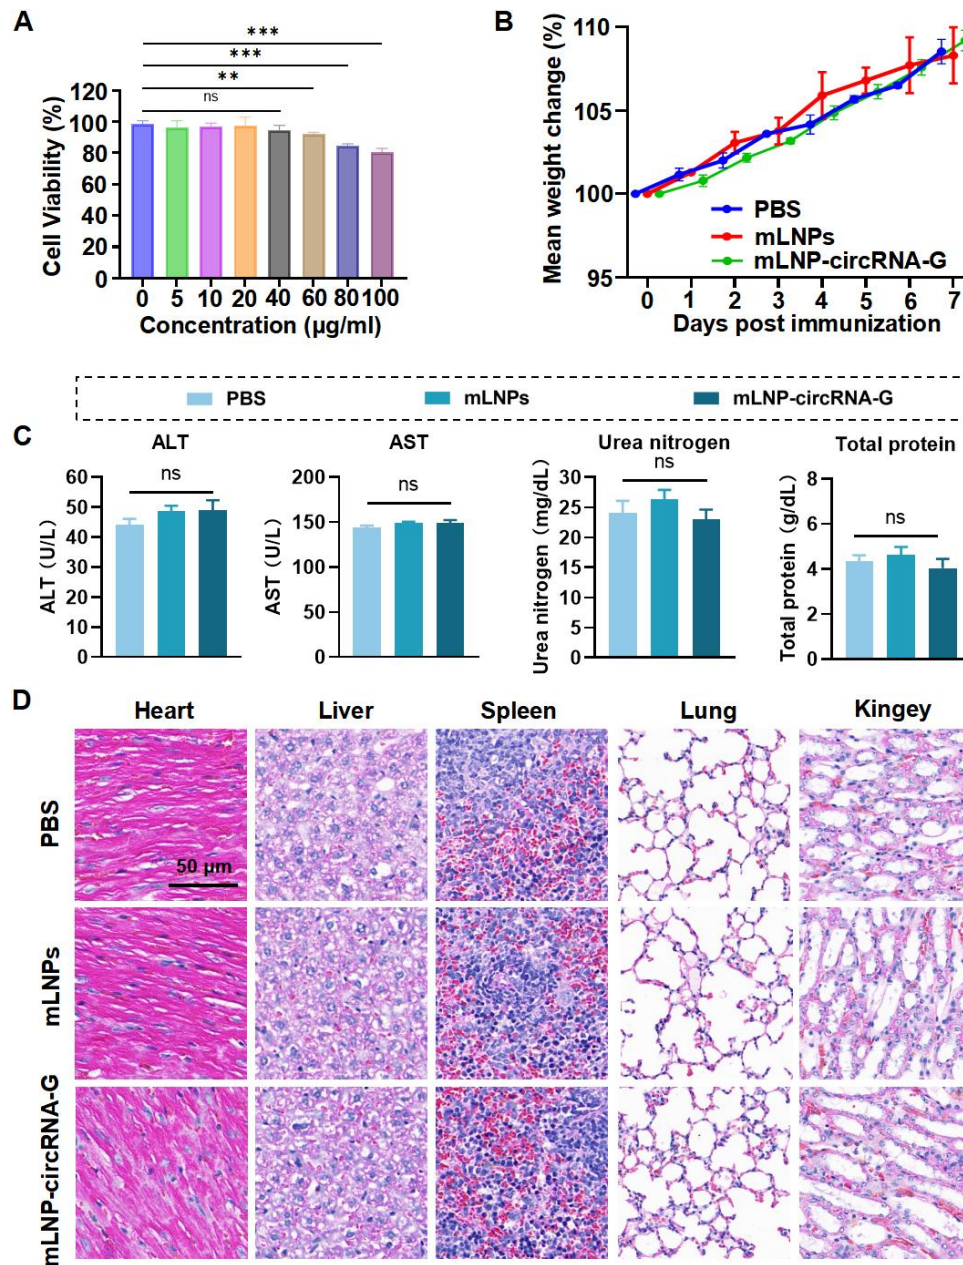

**Figure S15. Safety evaluation of mLNP-circRNA-G *in vivo* and *in vitro*.** (A) Cytotoxicity analysis of LPP-mRNA-G in HEK-293T cells by MTT assays. One-way ANOVA was used to evaluate intergroup differences. ns, no significant difference; Error bars represent SEM (n = 3). (B) ICR mice were injected intramuscularly with 30 µg of mLNPs or mLNP-circRNA-G for 24 h to evaluate the safety of mLNP-circRNA-G. Body weight changes in the mice were continuously monitored. Error bars represent SEM (n = 3). (C) Biochemical indicators of mLNPs and mLNP-circRNA-G-vaccinated mice were detected by an automatic hematological biochemical analyzer. (D) H&E analysis of major organs from mLNPs and mLNP-circRNA-G-vaccinated mice on day 2. Scale bars, 50 µm.



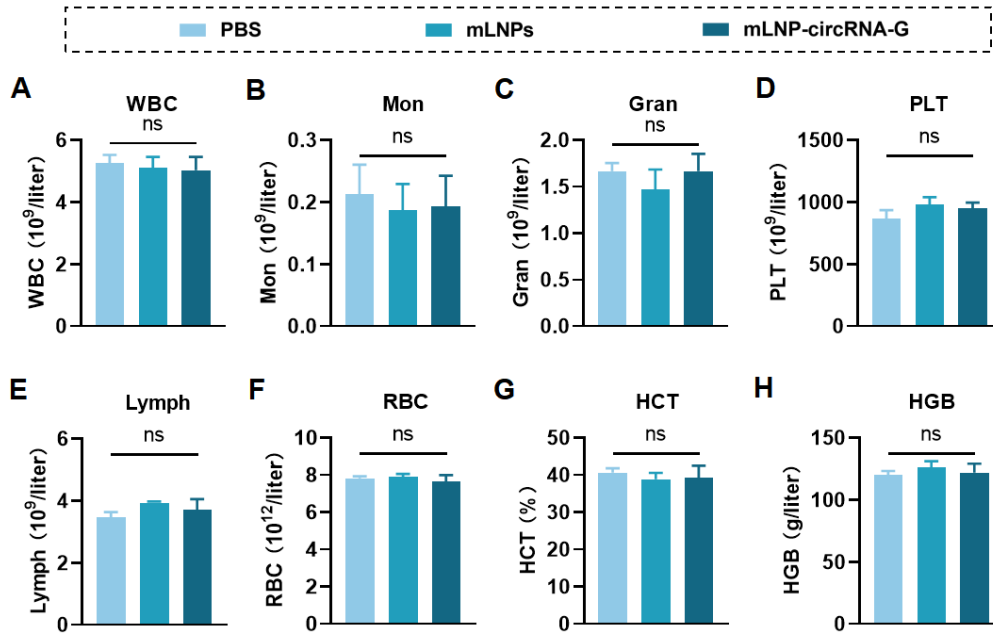

**Figure S16. Biochemical indicators of mLNPs and mLNP-circRNA-G-vaccinated mice.** (A-H) Biochemical indicators of mLNPs and mLNP-circRNA-G-vaccinated mice were detected by an automatic hematological biochemical analyzer.

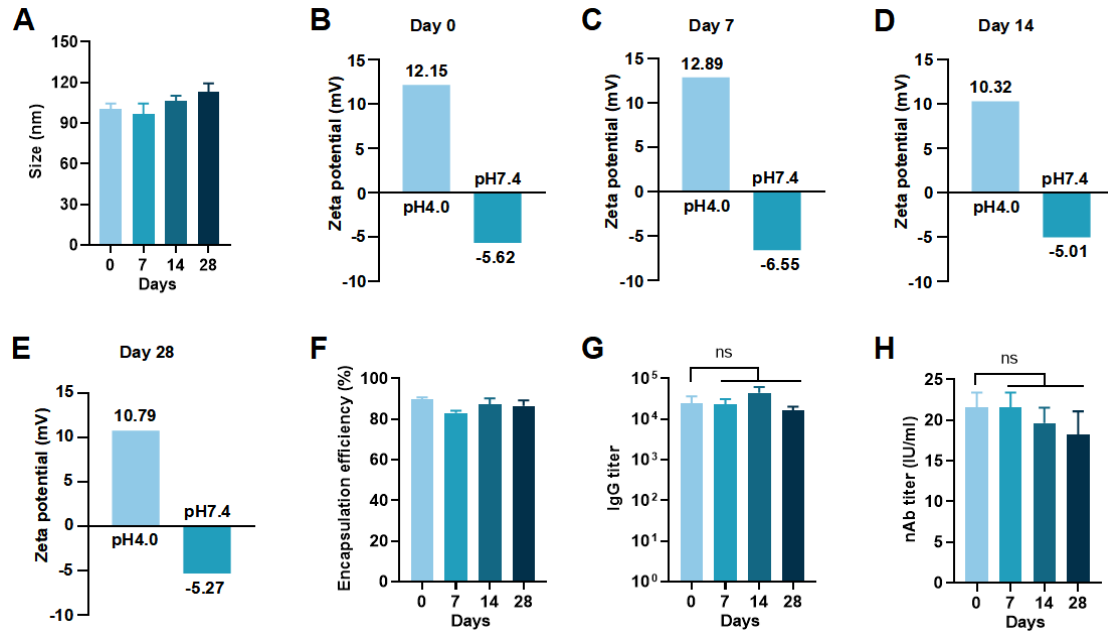

**Figure S17. Stability evaluation of mLNP-circRNA-G.** (A-H) Particle size (A), zeta potential (B-E), mRNA encapsulation efficiency (F), IgG titer (G) and nAb titer (H) (ICR mice were immunized once and serum samples were collected on day 14) were detected after mLNP-circRNA-G storage at 4 °C for 0, 7, 14 and 28 days.

**Supplemental Table**

**Table S1. The sequences of the mRNA-G.**

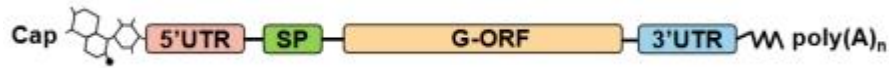

IVT template\_mRNA-G

5'-

GGGAAATAAGAGAGAAAAGAAGAGTAAGAAGAAATATAAGACCCCGGCGCCGCCACCAA  
**GCTTATGTTTCGTGTTCCCTGGTGCTGCTGCCCTGGTGAGCAGCCAGTGCCTGTTCCCTCAG**  
**GCTCTCCTGTTTGTACCCCTTCTGGTTTTTCCATTGTGTTTTGGGAAATCCCTATTTACACG**  
**ATACCAGACAAGCTTGGTCCCTGGAGTCCGATTGACATACATCACCTCAGCTGCCCAAACA**  
**ATTTGGTAGTGGAGGACGAAGGATGCACCAACCTGTCAGGGTTCTCCTACATGGAACCTTAA**  
**AGTTGGATACATCTTAGCCATAAAAGTGAACGGGTTCACTTGCACAGGCGTTGTGACGGAG**  
**GCTGAAACCTACACTAACTTCGTTGGTTATGTCACAACCACGTTCAAAGAAAAGCATTTC**  
**GCCCAACACCAGATGCATGTAGAGCCGCGTACAACCTGGAAGATGGCCGGTGACCCAGATA**  
**TGAAGAGTCTCTACACAATCCGTACCCTGACTACCGCTGGCTTCGAACTGTAAAAACCACC**  
**AAGGAGTCTCTCGTTATCATATCTCCAAGTGTGGCAGATTTGGACCCATATGACAGATCCCT**  
**TCACTCGAGGGTCTTCCCTAGCGGGAAGTGCTCAGGAGTAGCGGTGTCTTCTACCTACTGC**  
**TCCACTAACACGATTACACCATTTGGATGCCCGAGAATCCGAGACTAGGGATGTCTTGTGA**  
**CATTTTTACCAATAGTAGAGGGAAGAGAGCATCCAAAGGGAGTGAGACTTGCGGCTTTGTA**  
**GATGAAAGAGGCCTATATAAGTCTTTAAAAGGAGCATGCAAACCTCAAGTTATGTGGAGTTCT**  
**AGGACTTAGACTTATGGATGGAACATGGGTCTCGATGCAAACATCAAATGAAACCAAATGG**  
**TGCCCTCCCGATAAGTTGGTGAACCTGCACGACTTTCGCTCAGACGAAATTGAGCACCTTG**  
**TTGTAGAGGAGTTGGTCAGGAAGAGAGAGGAGTGTCTGGATGCACTAGAGTCCATCATGA**  
**CAACCAAGTCAGTGAGTTTCAGACGTCTCAGTCATTTAAGAAAACCTTGCCCTGGGTTTTGG**  
**AAAAGCATATACCATATTCAACAAGACCTTGATGGAAGCCGATGCTCACTACAAGTCAGTCA**  
**GAACTTGGAATGAGATCCTCCCTTCAAAGGGTGTTTAAGAGTTGGGGGGAGGTGTCATCC**  
**TCATGTGAACGGGGTGTTTTTCAATGGTATAATATTAGGACCTGACGGCAATGTCTTAATCCC**  
**AGAGATGCAATCATCCCTCCTCCAGCAACATATGGAGTTGTTGGAATCCTCGGTTATCCCC**  
**TTGTGCACCCCTGGCAGACCCGTCTACCGTTTTCAAGGACGGTGACGAGGCTGAGGATTT**  
**TGTTGAAGTTCACCTTCCCGATGTGCACAATCAGGCTCAGGAGTTGACTTGGGTCTCCCG**  
**AACTGGGGGAAGTATGTATTACTGAGTGCAGGGGCCCTGACTGCCTTGATGTTGATAATTTT**  
**CCTGATGACATGTTGTAGAAGAGTCAATCGATCAGAACCTACGCAACACAATCTCAGAGGG**  
**ACAGGGAGGGAGGTGTCAGTCACTCCCCAAAGCGGGAAGATCATATCTTCATGGGAATCAC**  
**ACAAGAGTGGGGGTGAGACCAGACTG**TGATAATAGGGTACCGCTGGAGCCTCGGTGGCCT****  
****AGCTTCTTGGCCCTTGGGCCTCCCCCAGCCCTCCTCCCTTCTGCACCCGTACCCCGT****  
****GGTCTTTGAATAAAGTCTGAGTGGGCGGCA-3'****

**Table S2. The sequences of circRNA-G produced via group I intron.**

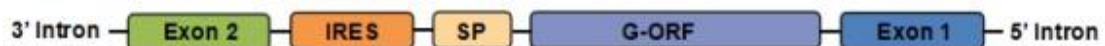

IVT template\_circRNA-G

5'-

AACAATAGATGACTTACAATAATCGGAAGGTGCAGAGACTCGACGGGAGCTACCCTAACG  
TCAAGACGAGGGTAAAGAGAGAGTCCAATTCTCAAAGCCAATAGGCAGTAGCGAAAGCTG  
CAAGAGAATGAAAATCCGTTGACCTTAAACGGTTCGTGTGGGTTCAAGTCCCTCCACCCCA  
CGCCGAAACGCAATAGCCGAAAAACAAAAACAAAAAAACAAAAAAACAAAA  
AAACAAAACACATTAACAGCCTGTGGGTTGATCCCACCCACAGGCCATTGGGCGCTAG  
CACTCTGGTATCACGGTACCTTTGTGCGCCTGTTTTATACCCCTCCCCCAACTGTAAGT  
AAGTAACACACACCGATCAACAGTCAGCGTGGCACACCAGCCACGTTTTGATCAAGCACTT  
CTGTTACCCCGGACTGAGTATCAATAGACTGCTCACGCGGTTGAAGGAGAAAGCGTTCGTT  
ATCCGGCCAACTACTTCGAAAAACCTAGTAACACCGTGGAAAGTTGCAGAGTGTTCGCTCA  
GCACTACCCAGTGTAGATCAGGTCGATGAGTCACCGCATTCCCACGGGCGACCGTGGCG  
GTGGCTGCGTTGGCGGCCTGCCATGGGAAACCCATGGGACGCTCTAATACAGACATGGT  
GCGAAGAGTCTATTGAGCTAGTTGGTAGTCCTCCGGCCCCTGAATGCGGCTAATCCTAACTG  
CGGAGCACACACCCCTCAAGCCAGAGGGCAGTGTGTCGTAACGGGCAACTCTGCAGCGGAA  
CCGACTACTTTGGGTGTCCGTGTTTCATTTTATTCTATACTGGCTGCTTATGGTGACAATTG  
AGAGATCGTTACCATATAGCTATTGGATTGGCCATCCGGTACTAATAGAGCTATTATATATCC  
CTTTGTTGGGTTTATACCACTTAGCTTGAAAGAGGTTAAACATTACAATTCATTGTTAAGTT  
GAATACAGCAAACTAGTGCCACCATGTTGCGTGTTCCTGGTGCTGCTGCCCTGGTGAGCA  
GCCAGTGCGTGTTTCTCAGGCTCTCCTGTTTGTACCCCTTCTGGTTTTTCCATTGTGTTTTG  
GGAAATTCCTATTTACACGATACCAGACAAGCTTGGTCCCTGGAGTCCGATTGACATACAT  
CACCTCAGCTGCCAAACAATTTGGTAGTGGAGGACGAAGGATGCACCAACCTGTCAGGG  
TTCTCCTACATGGAACCTAAAGTTGGATACATCTTAGCCATAAAAGTGAACGGGTTCACTTG  
CACAGGCGTTGTGACGGAGGCTGAAACCTACACTAACTTCGTTGGTTATGTCACAACCACG  
TTCAAAGAAAGCATTTCGCCCCAACACCAGATGCATGTAGAGCCGCGTACAACCTGGAAG  
ATGGCCGGTGACCCAGATATGAAGAGTCTCTACACAATCCGTACCCTGACTACCGCTGGCT  
TCGAACTGTAAAAACCACCAAGGAGTCTCTCGTTATCATATCTCCAAGTGTGGCAGATTTGG  
ACCCATATGACAGATCCCTTCACTCGAGGGTCTTCCCTAGCGGGAAGTGCTCAGGAGTAGC  
GGTGTCTTCTACCTACTGCTCCACTAACCACGATTACACCATTGGATGCCCAGAAATCCGA  
GACTAGGGATGTCTTGTGACATTTTTACCAATAGTAGAGGGAAGAGAGCATCCAAAGGGAG  
TGAGACTTGCGGCTTTGTAGATGAAAGAGGCCTATATAAGTCTTTAAAAGGAGCATGCAAA  
CTCAAGTTATGTGGAGTTCTAGGACTTAGACTTATGGATGGAACATGGGTCTCGATGCAAAC  
ATCAAATGAAACCAAATGGTGCCCTCCCGATAAGTTGGTGAACCTGCACGACTTTCGCTCA  
GACGAAATTGAGCACCTGTTGTAGAGGAGTTGGTCAGGAAGAGAGAGGAGTGTCTGGAT  
GCACTAGAGTCCATCATGACAACCAAGTCAGTGAGTTTCAGACGTCTCAGTCATTTAAGAA  
AACTTGTCCCTGGGTTTTGGAAAAGCATATACCATATTCAACAAGACCTTGATGGAAGCCGAT  
GCTCACTACAAGTCAGTCAGAACTTGGAATGAGATCCTCCCTTCAAAGGGTGTTTAAGAG  
TTGGGGGGAGGTGTCATCCTCATGTGAACGGGGTGTTTTTCAATGGTATAATATTAGGACCT  
GACGGCAATGTCTTAATCCCAGAGATGCAATCATCCCTCCTCCAGCAACATATGGAGTTGTT  
GGAATCCTCGGTTATCCCCCTGTGCAACCCCTGGCAGACCCGTCTACCGTTTTCAAGGACG  
GTGACGAGGCTGAGGATTTTGTGAAGTTCACCTTCCCAGTGTGCACAATCAGGTCTCAGG  
AGTTGACTTGGGTCTCCCGAACTGGGGGAAGTATGTATTACTGAGTGCAGGGGCCCTGACT  
GCCTTGATGTTGATAATTTTCTGATGACATGTTGTAGAAGAGTCAATCGATCAGAACCTAC  
GCAACACAATCTCAGAGGGACAGGGAGGGAGGTGTCAGTCACTCCCCAAAGCGGGAAGA  
TCATATCTTCATGGGAATCACACAAGAGTGGGGGTGAGACCAGACTGTGATAATAGACCGG  
TAAAAACAAAAACAAAACGGCTATTATGCGTTACCGGCGAGACGCTACGGACTTAAATA

ATTGAGCCTTAAAGAAGAAATTCTTTAAGTGGATGCTCTCAAACCTCAGGGAAACCTAAATC  
 TAGTTATAGACAAGGCAATCCTGAGCCAAGCCGAAGTAGTAATTAGTAAGACCAGTGGACA  
 ATCGACGGATAACAGCATATCTAGTTT-3'

**Table S3. The sequences of circRNA-RBD produced via group I intron.**

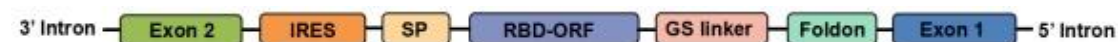

IVT template\_circRNA-RBD

5'-

AACAATAGATGACTTACAATAATCGGAAGGTGCAGAGACTCGACGGGAGCTACCCTAACG  
 TCAAGACGAGGGTAAAGAGAGAGTCCAATTCTCAAAGCCAATAGGCAGTAGCGAAAGCTG  
 CAAGAGAATGAAAATCCGTTGACCTTAAACGGTTCGTGTGGGTTCAAGTCCCTCCACCCCA  
 CGCCGAAACGCAATAGCCGAAAAACAAAAACAAAAACAAAAACAAAAACAAAA  
 AAACAAAACACATTAACAGCCTGTGGGTTGATCCCACCCACAGGCCATTGGGCGCTAG  
 CACTCTGGTATCACGGTACCTTTGTGCGCTGTTTTATACCCCTCCCCAACTGTAAGTTAG  
 AAGTAACACACACCGATCAACAGTCAGCGTGGCACACCAGCCACGTTTTGATCAAGCACTT  
 CTGTTACCCCGACTGAGTATCAATAGACTGCTCACGCGGTTGAAGGAGAAAGCGTTCGTT  
 ATCCGGCCAACTACTTCGAAAAACCTAGTAACACCGTGGAAAGTTGCAGAGTGTTCGCTCA  
 GCACTACCCAGTGTAGATCAGGTCGATGAGTACCCGATTCCCACGGGCGACCGTGGCG  
 GTGGCTGCGTTGGCGCCTGCCATGGGAAACCCATGGGACGCTCTAATACAGACATGGT  
 GCGAAGAGTCTATTGAGCTAGTTGGTAGTCTCCGGCCCCTGAATGCGGCTAATCCTAACTG  
 CGGAGCACACACCTCAAGCCAGAGGGCAGTGTGTCGTAACGGGCAACTCTGCAGCGGAA  
 CCGACTACTTTGGGTGTCCGTGTTTCATTTTATTCTATACTGGCTGCTTATGGTGACAATTG  
 AGAGATCGTTACCATATAGCTATTGGATTGGCCATCCGGTGACTAATAGAGCTATTATATATCC  
 CTTTGTGGGTTTATACCACTTAGCTTGAAAGAGGTTAAACATTACAATTCATTGTAAAGTT  
 GAATACAGCAAACTAGTGCCACCATGTTTCGTGTTTCCTGGTGCTGCTGCCCTGGTGAGCA  
 GCCAGTGCGTGAGGGTGCAGCCACCGAGTCCATCGTGAGGTTTCCTAACATACCAATCT  
 GTGTCCCTTCGGAGAGGTGTTCAATGCCACAAGGTTCCGCTCTGTGTATGCATGGAACCGC  
 AAGAGGATTTCCAACCTGCGTGGCTGATTACTCAGTGCTGTACAATTCAGCCAGCTTCTCCAC  
 ATTTAAGTGCTATGGCGTGTCTCCAATAAGCTGAACGATCTGTGCTTCACAAACGTGTACG  
 CCGACAGCTTCGTGATCCGCGGCGATGAAGTGAGACAGATCGCCCCAGGCCAGACCGGCA  
 AGATTGCCGACTACAATAAAGCTGCCTGATGATTCACAGGCTGCGTGATTGCCTGGAA  
 CAGCAACAATCTGGACAGCAAGGTGGGAGGCAATTACAATACTGTACCGCCTGTTTCAGG  
 AAGAGCAACCTCAAGCCTTCGAGAGGGACATCAGCACCGAGATCTACCAGGCTGGTTCTA  
 CCCATGTAACGGCGTGGAGGGTTTAACTGCTACTTCCCCCTGCAGAGTTACGGCTTCCA  
 GCCTACCAACGGAGTGGGCTACCAGCCATACCGCGTGGTGGTGTGCTGTCCTTCGAGCTGCTG  
 CACGCTCCAGCCACCGTGTGTGGCCCTAAGAAATCTACAAACCTGGTGAAGAACAAGTGC  
 GTGAACTTTGGCGGAGGAGGCAGCGCGGAGGAGGCAGCGGAAGCGGCTACATCCCAGA  
 AGCCCTAGAGACGGACAGGCTTACGTGCGAAAAGACGGCGAGTGGGTGCTGCTGAGCAC  
 ATTCCTGGGAAGGAGCTGATAATAGACCGGTAAAAACAAAAACAAAACGGCTATTATG  
 CGTTACCGGCGAGACGCTACGGACTTAAATAATTGAGCCTTAAAGAAGAAATTCTTTAAGT  
 GGATGCTCTCAAACCTCAGGGAAACCTAAATCTAGTTATAGACAAGGCAATCCTGAGCCAAG  
 CCGAAGTAGTAATTAGTAAGACCAGTGGACAATCGACGGATAACAGCATATCTAGTTT-3'
